# Supplementary material
Source: publisher figshare collection journal article supplement (https://acs.figshare.com/ndownloader/files/4099375)
Supplement: Supplementary file 1 [file 4099375]

## **Supplemental Information**

**Authors:** Suduan Gao, Husein Ajwa, Ruijun Qin, Michael Stanghellini, and David Sullivan

**Title:** Emission and Transport of 1,3-Dichloropropene and Chloropicrin in a Large Field Tarped with VaporSafe™ TIF

The supplemental information include one figure (Fig. S1) that shows the sampling locations for emissions using dynamic flux chambers, air under plastic tarp, and gas (10 depths at each location) in soil profile in Lost Hills fumigation trial, June 4-20, 2011.

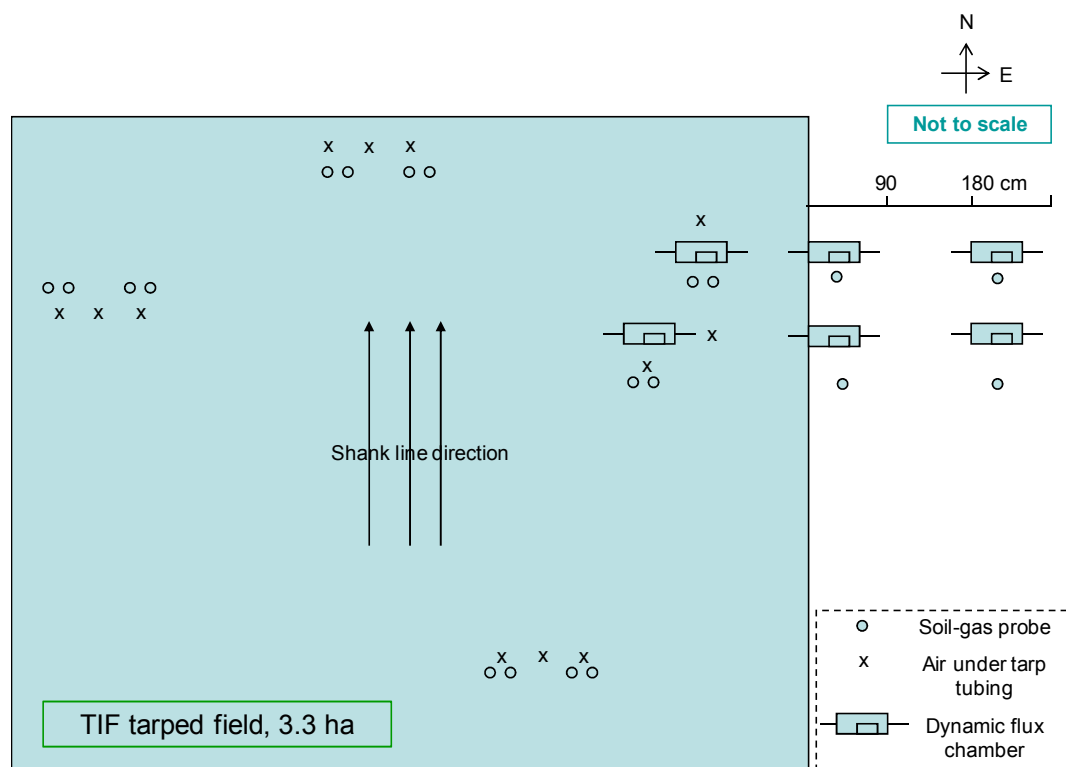

**Figure S1.** Sampling locations for air under tarp, soil gas (10 depths at each location) and emission with dynamic flux chambers in Lost Hills fumigation trial, June 4-20, 2011.
